# Supplementary material for: Natural Clays as Potential Amino Acids Carriers for Animal Nutrition Application
Source: MDPI journal article supplement (doi:10.3390/app11125669), 2021-06-18
Supplement: s1 [file s1]

## Article

# Natural Clays as Potential Amino Acids Carriers for Animal Nutrition Application

Cinzia Cristiani <sup>1,\*</sup>, Elisabetta Finocchio <sup>2,\*</sup>, Luciana Rossi <sup>3,\*</sup>, Carlotta Giromini <sup>3</sup>, Matteo Dell'Anno <sup>3</sup>, Sara Panseri <sup>3</sup> and Maurizio Bellotto <sup>4</sup>

<sup>1</sup> Politecnico di Milano, CMIC—Dipartimento di Chimica, Materiali e Ingegneria Chimica “G. Natta”, Piazza L. da Vinci 32, 20133 Milano, Italy

<sup>2</sup> Dipartimento di Ingegneria Civile, Chimica e Ambientale, Università di Genova, Via all'Opera Pia 15, 16145 Genova, Italy

<sup>3</sup> VESPA—Dipartimento di Scienze Veterinarie per la Salute, la Produzione Animale e la Sicurezza Alimentare, Università degli Studi di Milano, Via dell'Università 6, 26900 Lodi, Italy; carlotta.giromini@unimi.it (C.G.); matteo.dellanno@unimi.it (M.D.); sara.panseri@unimi.it (S.P.)

<sup>4</sup> Opigeo S.r.l.; Via dell'Industria, 6, 36047 Montegalda, VI, Italy; maurizio.bellotto@opigeo.eu

\* Correspondence: cinzia.cristiani@polimi.it (C.C.); elisabetta.finocchio@unige.it (E.F.); luciana.rossi@unimi.it (L.R.)

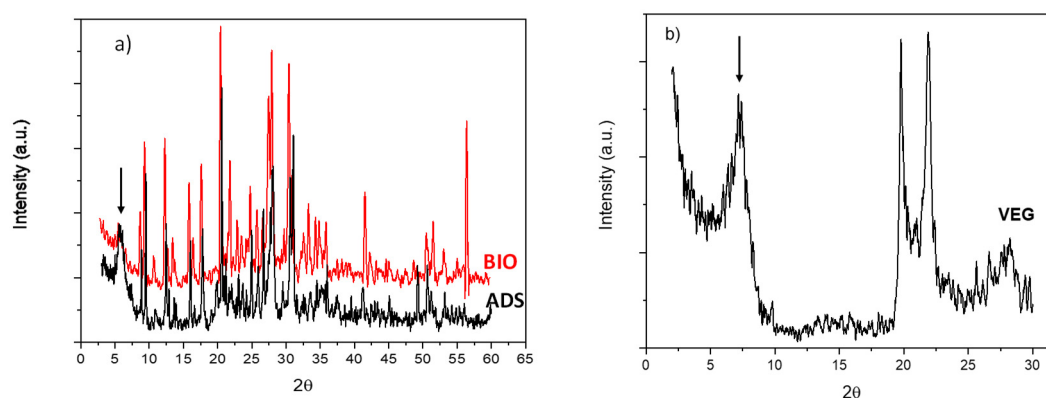

**Figure S1.** XRD patterns of the pristine carriers: a) Adsorbene and Bioki and b) Vegum. (arrows indicate basal reflection)

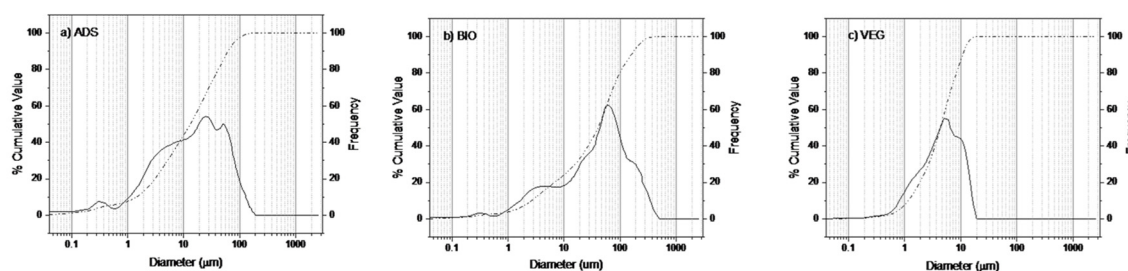

**Figure S2.** Granulometric analysis of a) Adsorbene, b) Bioki and c) Vegum.

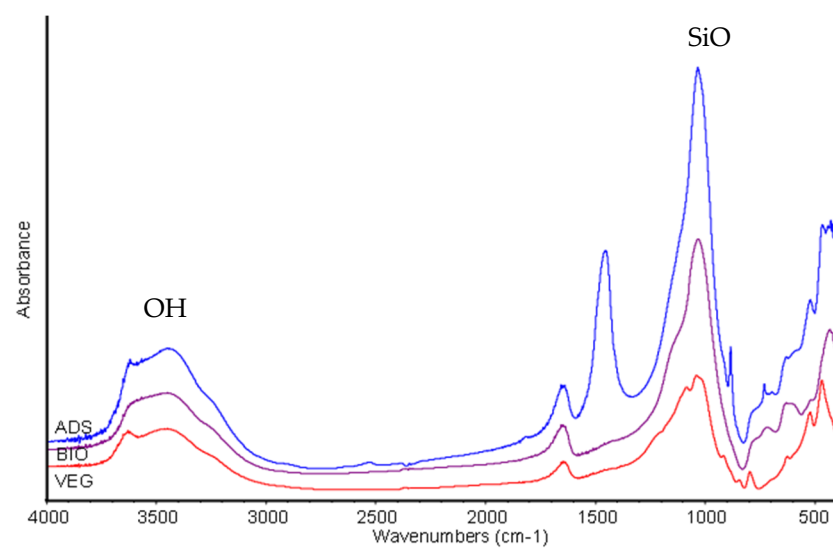

**Figure S3.** FTIR skeletal spectra of pristine carriers.

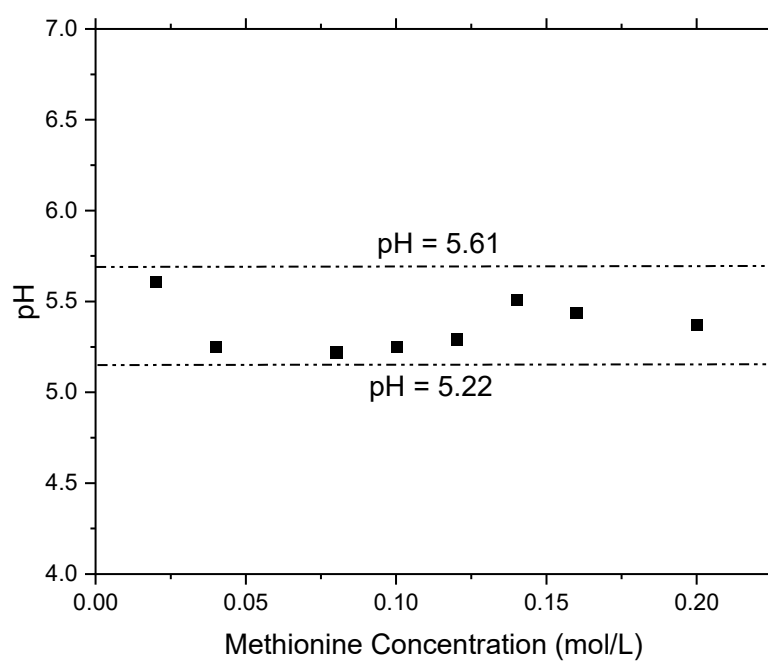

**Figure S4.** pH as a function of Methionine concentration in pure Methionine solution.

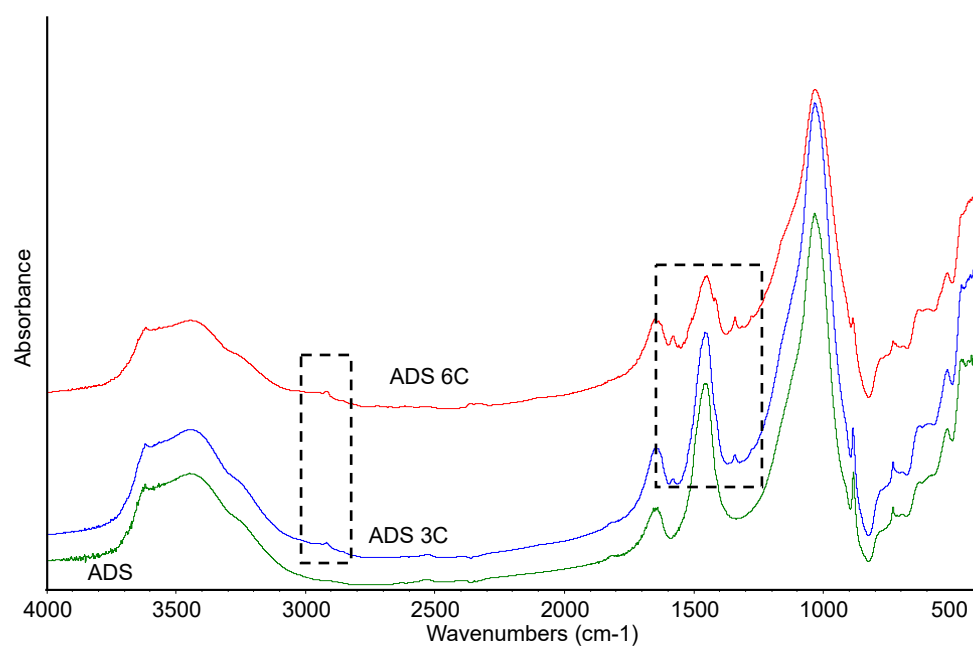

**Figure S5.** FT IR spectra of MET ADS samples and reference ADS after multiple contact tests (spectroscopic features of methionine molecules are evidenced, subtraction results are reported in the main text).

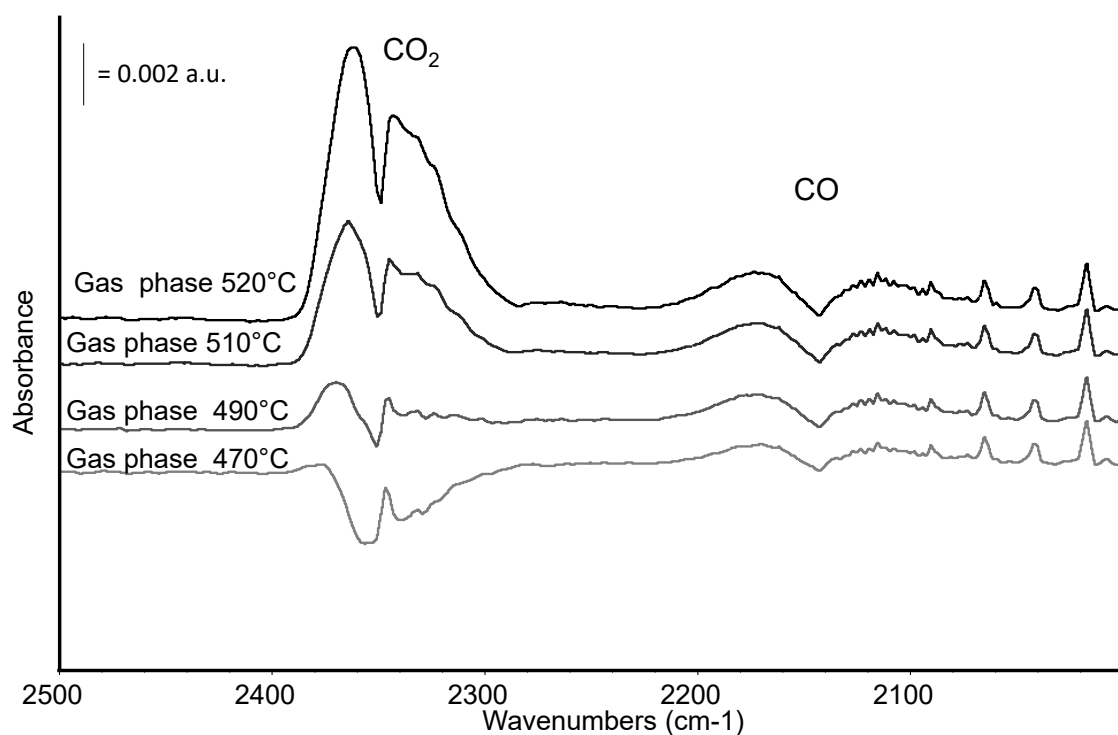

**Figure S6.** FT IR Spectra of the gas phase following heating at increasing temperature of MET-ADS 6C sample.
